# Cdc25A activity is required for the metaphase II arrest in mouse oocytes

Jeong Su Oh<sup>1,2</sup>, Andrej Susor<sup>1</sup>, Karen Schindler<sup>3,4</sup>, Richard M. Schultz<sup>3</sup> and Marco Conti<sup>1,\*</sup>

<sup>1</sup>Center for Reproductive Sciences and The Eli and Edythe Broad Center of Regeneration Medicine and Stem Cell Research, Department of Obstetrics, Gynecology and Reproductive Sciences at the University of California, San Francisco, CA 94143-0556, USA

<sup>2</sup>Department of Genetic Engineering, College of Biotechnology and Bioengineering, Sungkyunkwan University, Gyeonggi-do, 440-746, Korea

<sup>3</sup>Department of Biology, University of Pennsylvania, Philadelphia, PA 19104, USA

<sup>4</sup>Department of Genetics, Rutgers, The State University of New Jersey, Piscataway, NJ 08854, USA

\*Author for correspondence (contim@obgyn.ucsf.edu)

Accepted 11 December 2012

Journal of Cell Science 126, 1081–1085

© 2013. Published by The Company of Biologists Ltd

doi: 10.1242/jcs.115592

## Summary

Mammalian oocytes are arrested in metaphase of second meiosis (MII) until fertilization. This arrest is enforced by the cytostatic factor (CSF), which maintains the M-phase promoting factor (MPF) in a highly active state. Although the continuous synthesis and degradation of cyclin B to maintain the CSF-mediated MII arrest is well established, it is unknown whether cyclin-dependent kinase 1 (Cdk1) phosphorylations are involved in this arrest in mouse oocytes. Here, we show that a dynamic equilibrium of Cdk1 phosphorylation is required to maintain MII arrest. When the Cdc25A phosphatase is downregulated, mouse oocytes are released from MII arrest and MPF becomes inactivated. This inactivation occurs in the absence of cyclin B degradation and is dependent on Wee1B-mediated phosphorylation of Cdk1. Thus, our data demonstrate that Cdk1 activity is maintained during MII arrest not only by cyclin turnover but also by steady state phosphorylation.

**Key words:** Oocyte, Meiosis, Cdc25, MPF, CSF

## Introduction

Female gametes must complete a specialized meiotic cell cycle to become fertilizable eggs arrested at metaphase of the second meiotic division (MII) (Jones, 2005). During fertilization, the MII arrest is released by a series of  $\text{Ca}^{2+}$  oscillations induced by fusion with the spermatozoon. This cell cycle blockade is essential to prevent parthenogenetic activation and the development of an embryo without paternal genome contribution.

The molecular basis of this MII block was first explored in *Xenopus* oocytes when it was shown by cytoplasm transfer that MII oocytes contain an activity termed cytostatic factor (CSF), which prevents cell cycle progression (Masui and Markert, 1971). This activity functions primarily to stabilize the activated state of M-phase promoting factor (MPF), a complex of cyclin-dependent kinase 1 (Cdk1) and cyclin B (CycB). To date, several pathways involving the anaphase promoting complex/cyclosome (APC/C) inhibitor Emi2 (Schmidt et al., 2005), the Mos/p90rsk kinase cascade (Gross et al., 1999; Sagata et al., 1989), or the cyclin E/Cdk2 and spindle assembly checkpoint (SAC) components (Gabrielli et al., 1993; Grimison et al., 2006) have been implicated in the establishment and maintenance of CSF in *Xenopus* oocytes. However, not all of the above pathways are active in maintenance of MII block in mouse oocytes. Whereas Mos/Erk and Emi2 are essential (Verlhac et al., 2000; Shoji et al., 2006), neither the downstream target of Erk, p90rsk, nor SAC is necessary or sufficient for the MII suspension (Dumont et al., 2005; Tsurumi et al., 2004). The F-box protein Emi2, ortholog of the *Xenopus* XErp1/Emi2, exerts its cytostatic activity by preventing Cdc20 binding and activation of APC/C, a

multimeric E3 ubiquitin ligase responsible for CycB ubiquitination (Jones, 2005). Stabilization of CycB is considered the primary factor maintaining an active Cdk1 and the MII arrest (Kubiak et al., 1993). As an extension, the prevailing concept for the release from MII arrest at fertilization is that  $\text{Ca}^{2+}$  signals induce degradation of Emi2 and activation of the APC/C, thus initiating CycB degradation (Nixon et al., 2002; Madgwick et al., 2006) as well as inactivation of Mos/Erk pathway (Verlhac et al., 2000).

However, MPF is also regulated by the phosphorylation of two highly conserved residues in Cdk1, Thr14 and Tyr15 (Lew and Kornbluth, 1996). These inhibitory phosphorylations are catalyzed by Wee kinases, whereas dephosphorylation of these sites is mediated by the Cdc25 dual specificity phosphatases. The balance between these two activities depends on feedback regulations involving Cdk1 itself, as well the counteracting phosphatase PP2A (Glover, 2012). With the discovery of a regulatory network involving Greatwall kinase-dependent phosphorylation of the PP2A inhibitor endosulphine/Arpp19, the contribution of the Cdk1/Cdc25/Wee1 feedback to cell cycle progression has been clearly delineated (Gharbi-Ayachi et al., 2010; Mochida et al., 2010; Vigneron et al., 2009). Moreover, recent evidence in mouse oocytes indicates that the inhibitory phosphorylation of Cdk1 by Wee1 kinase plays a role in MPF inactivation during M-phase exit (Oh et al., 2011). Likewise, Cdc25C-dependent regulation of Cdk1 in CSF extracts has been documented in *Xenopus* oocytes (Lorca et al., 2010). Therefore, we explored the possibility that, in addition to CycB dynamics, MPF activity during MII arrest in mouse oocytes requires a

balance between the activity of Wee kinases and Cdc25 phosphatases. Here we show that Cdc25A is necessary to stabilize meiotic arrest, and downregulation of this activity by different strategies causes MPF phosphorylation and inactivation and MII exit without CycB degradation.

## Results and Discussion

### Cdc25A is required for MII arrest in mouse oocytes

To investigate the role of Cdk1 phosphorylation in MII arrest of mouse oocytes, Cdc25 phosphatase expression was downregulated by long double-stranded RNA (dsRNA). The effectiveness and specificity of this strategy was assessed by measuring mRNA and protein levels (supplementary material Fig. S1). When dsRNAs targeting Cdc25A were injected, a large fraction of oocytes were released from the MII arrest, chromosomes decondensed, and nuclear membrane reconstituted around two pronuclei-like structures, morphological changes consistent with transition to an interphase-like state (Fig. 1A,B; supplementary material Movie 1). This phenotype was dependent on the depletion of Cdc25A activity, as it was rescued by the concomitant injection of mRNAs encoding wild-type Cdc25A, but not the catalytically inactive Cdc25A (Fig. 1C). Morphologically, Cdc25A knockdown oocytes overexpressing wild-type Cdc25A showed a well organized spindle (supplementary material Fig. S1D). Therefore, these results provide a first indication that the Cdc25A phosphatase is required to maintain MII arrest in mouse oocytes. Protein levels of Cdc25B and C could not be efficiently downregulated with this strategy, even though mRNAs coding for these phosphatases were undetectable after dsRNA injection (supplementary material Fig. S1). As an alternative approach, we attempted to use morpholino oligonucleotides (MO) targeting Cdc25B and C. However, we were unable to design specific MO because of high GC ratios in potential target sequences of Cdc25B and C. A partial knockdown of Cdc25B activity by antibody injection led to the partial release from MII arrest (supplementary material Fig. S1E) similar to that observed with dsRNA (Fig. 1A), suggesting that Cdc25B is also involved in MII arrest. Cdc25C knockdown was not informative, as little decrease in protein could be detected under these conditions. Available knockout data indicate that Cdc25C is dispensable for meiosis and mitosis (Chen et al., 2001).

### MPF inactivation is mediated by Cdk1 phosphorylation rather than CycB degradation in Cdc25A-depleted oocytes

The above observation opens the possibility that the activation of MPF during the MII suspension depends on the continuous Cdk1 dephosphorylation by Cdc25A (Mailand et al., 2002). To

investigate this possibility, we measured MPF and MAPK activities and found that these are significantly decreased in oocytes depleted of Cdc25A (Fig. 2A,B). We next measured CycB levels because MPF inactivation is usually associated with CycB degradation during the release from MII arrest (Jones, 2005). Surprisingly, CycB was not degraded in Cdc25A knockdown oocytes (Fig. 2C,D). Instead, CycB levels increased 12–14 hours after knockdown. Given that CycB levels increase once pronuclei are formed in fertilized eggs (Chang et al., 2004), this finding further indicates that Cdc25A knockdown oocytes released from MII arrest were in interphase. Moreover, this implies that CycB degradation is dispensable for MPF inactivation during exit from M-phase. Indeed, it has been shown that dissociation of CycB from Cdk1, not its proteolytic degradation, may be involved in MPF inactivation during M-phase exit (Chesnel et al., 2006; Nishiyama et al., 2000; Yu et al., 2006). Furthermore, Cdc25A knockdown was sufficient to override the MII arrest induced by MG132, a proteasome inhibitor (Fig. 2E), further indicating that APC/C activation is not required.

CycB degradation is dependent on activity of APC/C in turn regulated by the SAC (Nixon et al., 2002). Therefore, we next asked whether Cdc25A knockdown overcomes the MII arrest induced by activated SAC. In agreement with the absence of CycB degradation after Cdc25A knockdown, SAC activation by nocodazole was not sufficient to prevent the release from MII arrest, indicating that Cdc25A effects are independent on APC/C-mediated proteolysis (Fig. 2F).

Because CycB is not degraded in Cdc25A knockdown oocytes, we investigated whether the decrease in MPF activity is due to a change in Cdk1 phosphorylation. Indeed, Cdk1 phosphorylation in Tyr15, which is barely detectable during MII arrest, becomes clearly evident in Cdc25A knockdown oocytes, suggesting that MPF inactivation is mostly due to accumulation of inhibitory Cdk1 phosphorylation rather than CycB degradation (Fig. 3A). Given that the inhibitory phosphorylation of Cdk1 is mediated by Wee1B kinase in mouse oocytes (Oh et al., 2011), we tested whether Wee1B downregulation rescues the phenotype induced by Cdc25A knockdown. Wee1B was downregulated by MOs as described previously (Oh et al., 2011). Strikingly, a significant number of oocytes depleted in Cdc25A and Wee1B did not exit from MII (Fig. 3B). This finding is in further support of the hypothesis that Cdc25A knockdown leads to MPF inactivation through inhibitory phosphorylations, and when the kinase responsible for this phosphorylation is downregulated, the phenotype is rescued. This scenario is also supported by an additional experiment where a constitutively active Cdk1 (Cdk1-AF) was injected and

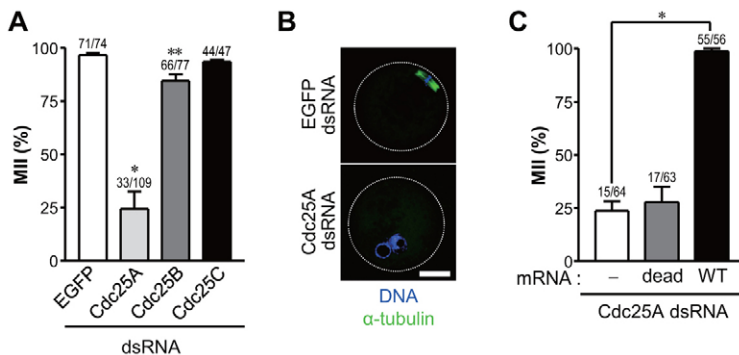

**Fig. 1. Knockdown of Cdc25 phosphatases.** (A) MII oocytes were injected with long double-stranded (ds) RNAs corresponding to Cdc25A, Cdc25B or Cdc25C. EGFP-dsRNA was used as a negative control. MII oocytes were scored after 24 hours. (B) Representative images of Cdc25A knockdown oocytes harvested at 24 hours. The spindle and DNA were stained with anti- $\alpha$ -tubulin and DAPI, respectively. Scale bar: 20  $\mu$ m. (C) MII oocytes were co-injected with Cdc25A dsRNA and mRNA encoding catalytically inactive or wild-type human Cdc25A and scored as above. Representative images are shown in supplementary material Fig. S1D. Data are means  $\pm$  s.e.m. of at least three independent experiments. Numbers above the bars indicate the number of oocytes in MII and total oocyte number.

\* $P < 0.0005$ , \*\* $P < 0.01$ .

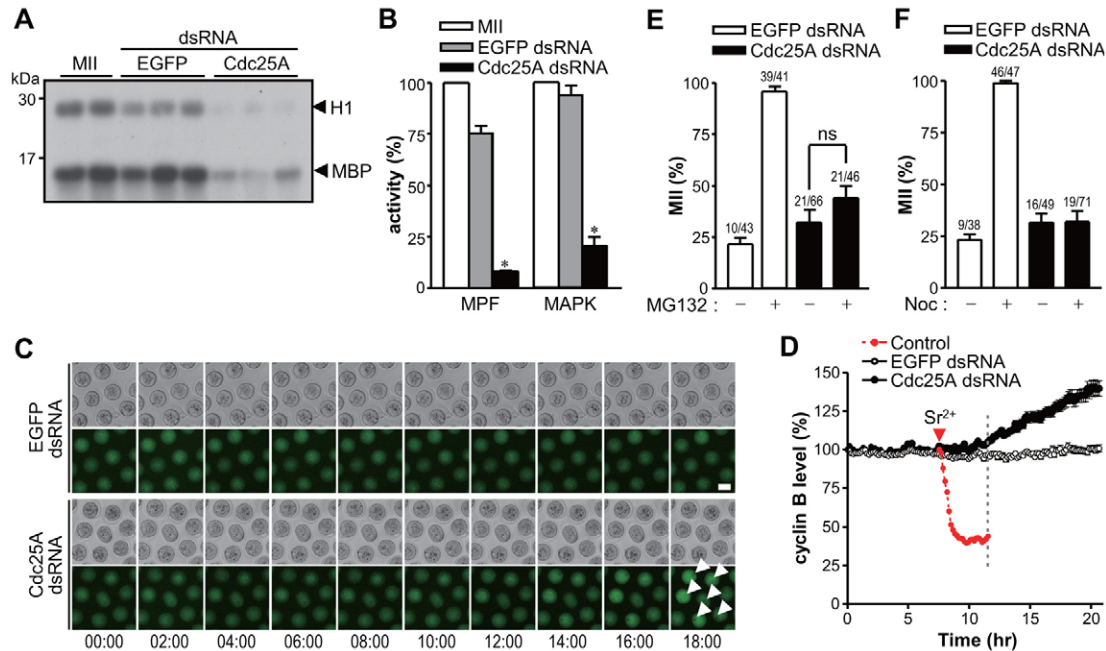

**Fig. 2. Decrease in MPF activity in Cdc25A knockdown oocytes.** (A,B) Histone H1 and MBP (myelin basic protein) double kinase assay in Cdc25A knockdown oocytes. MII oocytes injected with either EGFP or Cdc25A dsRNA were cultured for 24 hours. MPF and MAPK activities were measured as  $^{32}$ P incorporation by histone H1 and MBP. Freshly ovulated MII oocytes were used as an additional control. (B) The ratio of  $^{32}$ P incorporation into H1 and MBP were quantified densitometrically and reported as means  $\pm$  s.e.m. \* $P < 0.0005$  compared to EGFP dsRNA. (C,D) MII oocytes were co-injected with Cdc25A dsRNA and CycB1-GFP mRNA, and GFP levels measured every 10 minutes up to 24 hours. Representative images are shown in C. Scale bar: 60  $\mu$ m. Arrowheads indicate pronuclei without GFP signal. (D) Quantification of cyclin B levels. As a control, MII oocytes injected with CycB1-GFP were parthenogenetically activated with strontium and GFP levels measured until pronuclear formation. The timing of pronuclear formation is marked by a dotted line. Data are the means  $\pm$  s.e.m. using 16 oocytes from three independent experiments. (E,F) MII oocytes injected with Cdc25A dsRNA were incubated with (+) or without (-) either MG132 (E) or nocodazole (F) for 24 hours. The percentage of treated oocytes in MII was then determined. As a control, MII oocytes injected with EGFP dsRNA were activated with strontium. Numbers above the bars indicate the number of MII oocytes/total oocytes. ns, not significant.

rescued the release from MII arrest induced by Cdc25A knockdown (Fig. 3C). Thus, Cdk1 phosphorylation rather than CycB degradation is the primary event downstream of Cdc25A depletion.

An additional possibility is that Cdk2, rather than Cdk1, is the Cdc25A target in mouse oocytes. Even though Cdk2 in complex with cyclin E is required for CSF arrest in *Xenopus* oocytes, and both Cdk2 and Cdk1 are substrates of Cdc25A (Gabielli et al., 1993; Sexl et al., 1999), this is unlikely because Cdk2–cyclin E inhibits APC/C-mediated CycB degradation by regulating SAC activity (Grimison et al., 2006). Indeed, injection of a constitutively

active Cdk2 (Cdk2-AF) mutant did not prevent the exit from M phase (Fig. 3C). Furthermore, we were not able to detect cyclin E in MII oocytes, and oocytes expressing Cdk2-AF mutant did not prevent  $\text{Ca}^{2+}$ -mediated release from MII arrest (supplementary material Fig. S2). Therefore, unlike that shown in *Xenopus*, Cdk2 does not participate in maintaining CSF-mediated MII arrest in mouse oocytes. Consistent with this conclusion, it has been shown that SAC is not required for MII arrest in mouse oocytes (Tsurumi et al., 2004). Taken together, our data indicate that Cdc25A is required to maintain MPF activity during MII arrest, predominately by removing the inhibitory Cdk1 phosphorylation.

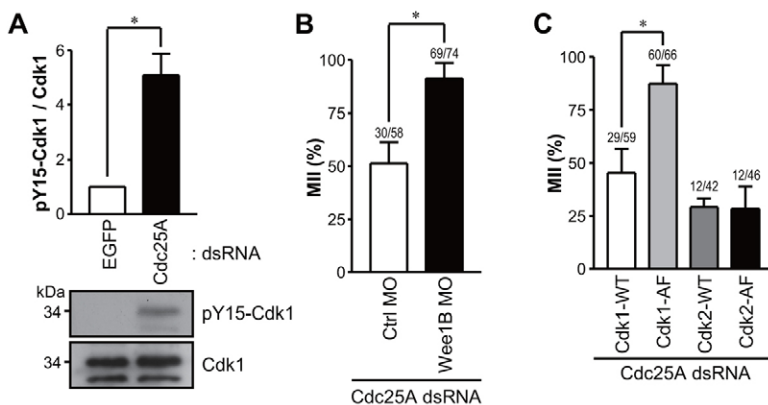

**Fig. 3. Cdk1 phosphorylation in Cdc25A knockdown oocytes.**

(A) Immunoblot analysis of phospho-tyrosine Cdk1 in Cdc25A knockdown oocytes. MII oocytes injected with EGFP or Cdc25A dsRNA were incubated for 24 hours and subjected to SDS-PAGE followed by immunoblotting for Cdk1 and Cdk1 phospho-tyrosine 15 (pY15-Cdk1). The pY15-Cdk1/Cdk1 ratio is reported together with an immunoblot representative of three experiments performed. (B) *In vitro* matured MII oocytes injected with control (Ctrl) or Wee1B MO were injected with Cdc25A dsRNA and incubated for 24 hours. (C) Cdc25A dsRNA was co-injected into MII oocytes with mRNAs encoding Cdk1-WT, Cdk1-AF, or Cdk2-WT and Cdk2-AF. The percentage of treated oocytes in MII was determined for B and C. Data are the means  $\pm$  s.e.m. of at least three independent experiments. Numbers above the bars indicate the number of MII oocytes/total oocyte number. \* $P < 0.05$ .



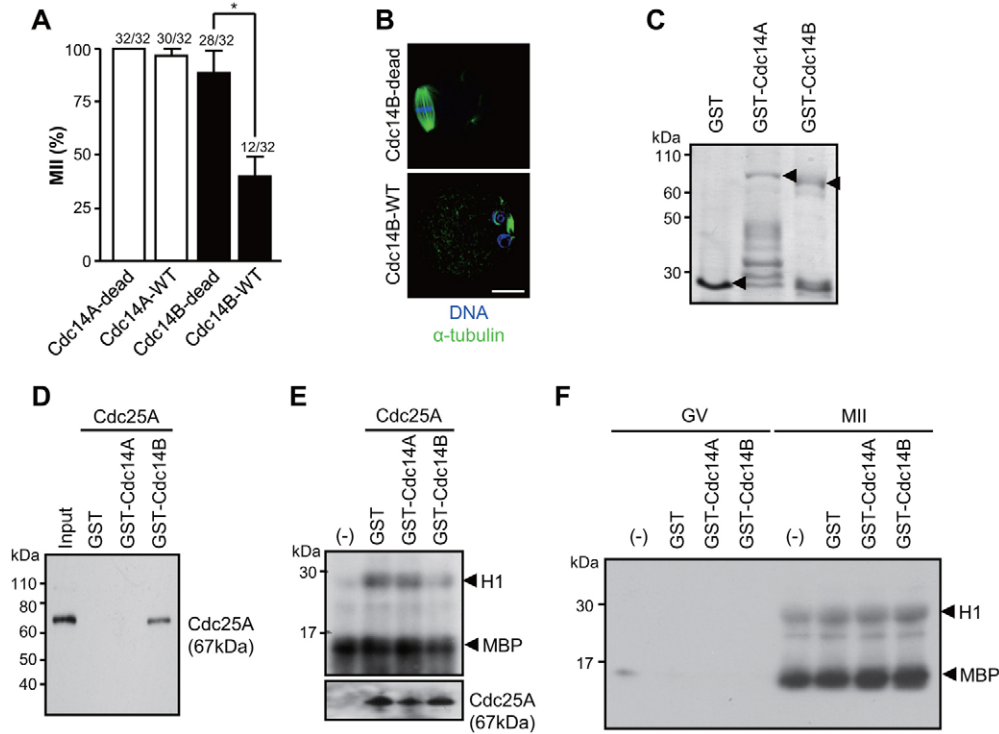

**Fig. 4. Cdc14 effect on MII arrest and interaction with Cdc25A.** (A) MII oocytes were injected with mRNAs coding for Cdc14A or B, and the percentage of treated oocytes in MII was scored after 24 hours. Numbers above the bars indicate the number of oocytes in the MII stage as well as total number of oocytes used. \* $P < 0.005$ . (B) Representative images of Cdc14B-overexpressing oocytes. The spindle and DNA were stained with anti- $\alpha$ -tubulin and DAPI, respectively. Scale bar: 20  $\mu$ m. (C) GST fusion proteins used in the pull-down assay (arrowhead) were separated by SDS-PAGE and stained with Coomassie Brilliant Blue. (D) GST fusion proteins were immunoprecipitated from the cell lysates overexpressing Cdc25A. Proteins recovered in the immunoprecipitation pellet were immunoblotted for Cdc25A. (E) Immunoprecipitated Cdc25As were pre-incubated with GST fusion proteins and H1/MBP double kinase assay was performed with GV oocyte lysates. (F) GST fusion proteins were subjected to H1/MBP double kinase assay with GV or MII oocytes lysates. Water was loaded as a negative control (–).

Recently, it has been shown that Cdc14B phosphatase inactivates Cdc25A thereby decreasing MPF activity during late mitosis (Tumurbaatar et al., 2011). Therefore, we experimentally manipulated Cdc14 activity as an alternative strategy to inactivate Cdc25A. Similar to Cdc25A knockdown, overexpression of Cdc14B induces pronuclear formation (Fig. 4A,B), whereas Cdc14A had no effect. Moreover, Cdc14B, but not Cdc14A, directly interacted with Cdc25A, and this interaction decreased the phosphatase activity of Cdc25A towards MPF but not towards MAPK (Fig. 4C–E). It should be noted that Cdc14B itself did not affect MPF or MAPK activity (Fig. 4F), indicating that the decrease in MPF activity is dependent on Cdc25A inactivation. Consistent with this finding is the observation that Cdc14B does not directly target MPF but rather regulates MPF activity by inactivating Cdc25A (Tumurbaatar et al., 2011). Thus, these data conclusively demonstrate that Cdc25A is required to maintain MPF activity during MII arrest in mouse oocytes.

## Conclusions

It is well established that CycB degradation is a key event for meiotic and mitotic exit enabling progression from metaphase to anaphase (Murray et al., 1989). Recently, however, mounting evidence suggests that MPF inactivation does not solely depend on CycB degradation during either meiosis (Chesnel et al., 2006) or mitosis (Nishiyama et al., 2000). Conversely, the inhibitory phosphorylation of Cdk1 is also necessary for MPF inactivation during M-phase exit (Chow et al., 2011; D'Angiolella et al., 2007; Oh et al., 2011; Potapova et al., 2009). Using several independent approaches, we show here that this phosphorylation participates in the MPF regulation during CSF-mediated MII arrest in mouse oocytes. MPF activity in MII is maintained by a Cdc25-mediated dephosphorylation of Cdk1 as well as by CycB levels. Disrupting this loop by downregulation of Cdc25A causes the oocyte release from MII arrest mostly through accumulation of the inhibitory phosphorylation of Cdk1. It has

been shown that removal of Cdc25C from *Xenopus* CSF extracts also induces loss of mitotic state (Lorca et al., 2010). Given that this phosphorylation is mediated by Wee1B kinase in mouse oocytes, we propose that the balance between the activities of Wee kinases and Cdc25 phosphatases is a critical circuit required for the MII arrest in oocytes. In addition and as a complement to our findings on Wee1B regulation, it is likely that exit from the MII phase requires inactivation of Cdc25. Thus, our data demonstrate that MPF activity required for the MII arrest is maintained not only by CycB dynamics but also by Cdk1 phosphorylation.

## Materials and Methods

### Oocyte collection and microinjection

Oocytes were obtained, cultured and microinjected as described previously (Oh et al., 2011). The microinjected oocytes were incubated with cytochalasin B (1  $\mu$ g/ml) for 24 hours to prevent second polar body extrusion. Nocodazole or MG132 was added to media at a concentration of 100 nM and 1  $\mu$ M, respectively. Oocytes were observed and imaged on an inverted microscope (DMI 4000B; Leica).

### Plasmids, morpholino oligonucleotides and preparation of mRNAs and double strand RNAs

The full-length cDNA coding the human Cdc25A was purchased from Origene. The catalytically inactive mutant of human Cdc25A (C431S) was generated using site-directed mutagenesis. Cdc14A and B were cloned as described previously (Schindler and Schultz, 2009b; Schindler and Schultz, 2009a). Wild-type Cdk2 (Cdk2-WT) and constitutively active Cdk2 (Cdk2-AF), GST-tagged Cdc14 phosphatases and H2B-mCherry were gifts from D. Morgan, Y. Wang and M. Anger, respectively. Capped mRNAs for microinjection were synthesized *in vitro* using mMESSAGE mMACHINE kit (Ambion), polyadenylated, and then purified with the MEGAclear kit (Ambion). MOs were designed as described previously (Oh et al., 2011). For double strand RNAs, PCR products were used as a template for *in vitro* transcription using the MEGAscript Kit (Ambion). PCR primers are reported in supplementary material Table S1.

### RT-PCR

Total RNAs were extracted from oocytes (Qiagen) followed by reverse transcription using Sensiscript RT kit (Qiagen). PCR was performed using primers reported in supplementary material Table S1.

### Immunoblotting and kinase assay

Oocytes were collected in phosphate-buffered saline (PBS) containing 1% polyvinylpyrrolidone (PVP) and frozen in SDS sample buffer. Western blotting

was performed using antibodies against Cdc25 phosphatases (sc-65503; Santa Cruz),  $\alpha$ -tubulin (ab7291; Abcam), Cdk1 (sc-954; Santa Cruz), Cdk1 phosphotyrosine 15 (sc-7989; Santa Cruz), cyclin E1(sc-481; Santa Cruz), or cyclin E2 (4132; Cell Signaling). Histone H1 and myelin basic protein kinase (MBP) assays were performed as previously described (Svoboda et al., 2000). Briefly, MII oocytes injected with either EGFP dsRNA or Cdc25A dsRNA were lysed and incubated with histone H1 and MBP in the presence of [ $\gamma$ - $^{32}$ P]ATP. The intensity of spots on the autoradiogram was quantified by ImageJ software.

#### Protein interaction assays

GST, GST-Cdc14A, and GST-Cdc14B proteins were expressed in *Escherichia coli* and affinity purified. For pull-down assay, HEK293 cells were transfected with full-length Cdc25A clones and cell lysates were incubated with GST fusion proteins. The bound proteins were subjected to SDS-PAGE and immunoblotted with Cdc25A antibody. To measure the phosphatase activity of Cdc25A bound to Cdc14 proteins, immunoprecipitated Cdc25A was preincubated with GST fusion proteins, and H1/MBP kinase assay was performed with GV oocyte lysates.

#### Immunofluorescence imaging

Immunofluorescence was performed as described previously (Oh et al., 2011). Anti-mouse acetylated  $\alpha$ -tubulin antibody (Sigma) was used to label the spindle. Primary antibody was detected with an Alexa-Fluor-488-conjugated goat polyclonal anti-mouse IgG (Molecular Probes) followed by incubation with DAPI for DNA staining. Immunostaining was visualized using an inverted confocal microscope (TCS SP5; Leica) with 63 $\times$  objective.

#### Quantification and statistical analyses

Immunoreactive band or fluorescence intensity was measured using ImageJ software. Background correction and normalization were performed using Microsoft Excel software. Statistical analysis was performed using GraphPad software. Data are average of at least three independent experiments unless otherwise specified. Values were analyzed by one-way ANOVA or Student's *t*-test, and *P*<0.05 was considered statistically significant.

#### Acknowledgements

We thank David Morgan for Cdk2 plasmids, Martin Anger for H2B-mCherry plasmids, and Yisong Wang for the Cdc14-GST plasmids.

#### Author contributions

J.O. conceived and designed the study. J.O., A.S. and K.S. performed and analyzed experiments in this study. M.C. and R.S. supervised the study. J.O. wrote an initial draft of the manuscript, which all authors commented on and edited.

#### Funding

This work was supported by the National Institutes of Health [grant number GM08527 to M.C.]; and the Next-Generation BioGreen 21 Program, Rural Development Administration, Republic of Korea [grant number PJ009024 to J.O.]. Deposited in PMC for release after 12 months.

Supplementary material available online at

<http://jcs.biologists.org/lookup/suppl/doi:10.1242/jcs.115592/-/DC1>

#### References

- Chang, H. Y., Levasseur, M. and Jones, K. T. (2004). Degradation of APCcd20 and APCdh1 substrates during the second meiotic division in mouse eggs. *J. Cell Sci.* **117**, 6289-6296.
- Chen, M. S., Hurov, J., White, L. S., Woodford-Thomas, T. and Pivnicka-Worms, H. (2001). Absence of apparent phenotype in mice lacking Cdc25C protein phosphatase. *Mol. Cell. Biol.* **21**, 3853-3861.
- Chesnel, F., Bazile, F., Pascal, A. and Kubiak, J. Z. (2006). Cyclin B dissociation from CDK1 precedes its degradation upon MPF inactivation in mitotic extracts of *Xenopus laevis* embryos. *Cell Cycle* **5**, 1687-1698.
- Chow, J. P., Poon, R. Y. and Ma, H. T. (2011). Inhibitory phosphorylation of cyclin-dependent kinase 1 as a compensatory mechanism for mitosis exit. *Mol. Cell. Biol.* **31**, 1478-1491.
- D'Angioliella, V., Palazzo, L., Santarpia, C., Costanzo, V. and Grieco, D. (2007). Role for non-proteolytic control of M-phase-promoting factor activity at M-phase exit. *PLoS ONE* **2**, e247.
- Dumont, J., Umbhauer, M., Rassinier, P., Hanauer, A. and Verlhac, M. H. (2005). p90Rsk is not involved in cytotstatic factor arrest in mouse oocytes. *J. Cell Biol.* **169**, 227-231.
- Gabrielli, B. G., Roy, L. M. and Maller, J. L. (1993). Requirement for Cdk2 in cytotstatic factor-mediated metaphase II arrest. *Science* **259**, 1766-1769.
- Gharbi-Ayachi, A., Labbé, J.-C., Burgess, A., Vigneron, S., Strub, J.-M., Brioudes, E., Van-Dorsselaer, A., Castro, A. and Lorca, T. (2010). The substrate of Greatwall kinase, Arpp19, controls mitosis by inhibiting protein phosphatase 2A. *Science* **330**, 1673-1677.
- Glover, D. M. (2012). The overlooked greatwall: a new perspective on mitotic control. *Open Biol.* **2**, 120023.
- Grimison, B., Liu, J., Lewellyn, A. L. and Maller, J. L. (2006). Metaphase arrest by cyclin E-Cdk2 requires the spindle-checkpoint kinase Mps1. *Curr. Biol.* **16**, 1968-1973.
- Gross, S. D., Schwab, M. S., Lewellyn, A. L. and Maller, J. L. (1999). Induction of metaphase arrest in cleaving *Xenopus* embryos by the protein kinase p90Rsk. *Science* **286**, 1365-1367.
- Jones, K. T. (2005). Mammalian egg activation: from Ca<sup>2+</sup> spiking to cell cycle progression. *Reproduction* **130**, 813-823.
- Kubiak, J. Z., Weber, M., de Pennart, H., Winston, N. J. and Maro, B. (1993). The metaphase II arrest in mouse oocytes is controlled through microtubule-dependent destruction of cyclin B in the presence of CSF. *EMBO J.* **12**, 3773-3778.
- Lew, D. J. and Kornbluth, S. (1996). Regulatory roles of cyclin dependent kinase phosphorylation in cell cycle control. *Curr. Opin. Cell Biol.* **8**, 795-804.
- Lorca, T., Bernis, C., Vigneron, S., Burgess, A., Brioudes, E., Labbé, J. C. and Castro, A. (2010). Constant regulation of both the MPF amplification loop and the Greatwall-PP2A pathway is required for metaphase II arrest and correct entry into the first embryonic cell cycle. *J. Cell Sci.* **123**, 2281-2291.
- Madgwick, S., Hansen, D. V., Levasseur, M., Jackson, P. K. and Jones, K. T. (2006). Mouse Emi2 is required to enter meiosis II by reestablishing cyclin B1 during interkinesis. *J. Cell Biol.* **174**, 791-801.
- Mailand, N., Podtelejnikov, A. V., Groth, A., Mann, M., Bartek, J. and Lukas, J. (2002). Regulation of G(2)/M events by Cdc25A through phosphorylation-dependent modulation of its stability. *EMBO J.* **21**, 5911-5920.
- Masui, Y. and Markert, C. L. (1971). Cytoplasmic control of nuclear behavior during meiotic maturation of frog oocytes. *J. Exp. Zool.* **177**, 129-145.
- Mochida, S., Maslen, S. L., Skehel, M. and Hunt, T. (2010). Greatwall phosphorylates an inhibitor of protein phosphatase 2A that is essential for mitosis. *Science* **330**, 1670-1673.
- Murray, A. W., Solomon, M. J. and Kirschner, M. W. (1989). The role of cyclin synthesis and degradation in the control of maturation promoting factor activity. *Nature* **339**, 280-286.
- Nishiyama, A., Tachibana, K., Igarashi, Y., Yasuda, H., Tanahashi, N., Tanaka, K., Ohsumi, K. and Kishimoto, T. (2000). A nonproteolytic function of the proteasome is required for the dissociation of Cdc2 and cyclin B at the end of M phase. *Genes Dev.* **14**, 2344-2357.
- Nixon, V. L., Levasseur, M., McDougall, A. and Jones, K. T. (2002). Ca(2+) oscillations promote APC/C-dependent cyclin B1 degradation during metaphase arrest and completion of meiosis in fertilizing mouse eggs. *Curr. Biol.* **12**, 746-750.
- Oh, J. S., Susor, A. and Conti, M. (2011). Protein tyrosine kinase Wee1B is essential for metaphase II exit in mouse oocytes. *Science* **332**, 462-465.
- Potapova, T. A., Daum, J. R., Byrd, K. S. and Gorbysky, G. J. (2009). Fine tuning the cell cycle: activation of the Cdk1 inhibitory phosphorylation pathway during mitotic exit. *Mol. Biol. Cell* **20**, 1737-1748.
- Sagata, N., Watanabe, N., Vande Woude, G. F. and Ikawa, Y. (1989). The c-mos proto-oncogene product is a cytotstatic factor responsible for meiotic arrest in vertebrate eggs. *Nature* **342**, 512-518.
- Schindler, K. and Schultz, R. M. (2009a). CDC14B acts through FZR1 (CDH1) to prevent meiotic maturation of mouse oocytes. *Biol. Reprod.* **80**, 795-803.
- Schindler, K. and Schultz, R. M. (2009b). The CDC14A phosphatase regulates oocyte maturation in mouse. *Cell Cycle* **8**, 1090-1098.
- Schmidt, A., Duncan, P. I., Rauh, N. R., Sauer, G., Fry, A. M., Nigg, E. A. and Mayer, T. U. (2005). *Xenopus* polo-like kinase Plx1 regulates XErp1, a novel inhibitor of APC/C activity. *Genes Dev.* **19**, 502-513.
- Sextl, V., Diehl, J. A., Sherr, C. J., Ashmun, R., Beach, D. and Roussel, M. F. (1999). A rate limiting function of cdc25A for S phase entry inversely correlates with tyrosine dephosphorylation of Cdk2. *Oncogene* **18**, 573-582.
- Shoji, S., Yoshida, N., Amanai, M., Ohgishi, M., Fukui, T., Fujimoto, S., Nakano, Y., Kajikawa, E. and Perry, A. C. (2006). Mammalian Emi2 mediates cytotstatic arrest and transduces the signal for meiotic exit via Cdc20. *EMBO J.* **25**, 834-845.
- Svoboda, P., Stein, P., Hayashi, H. and Schultz, R. M. (2000). Selective reduction of dormant maternal mRNAs in mouse oocytes by RNA interference. *Development* **127**, 4147-4156.
- Tsurumi, C., Hoffmann, S., Geley, S., Graeser, R. and Polanski, Z. (2004). The spindle assembly checkpoint is not essential for CSF arrest of mouse oocytes. *J. Cell Biol.* **167**, 1037-1050.
- Tumurbaatar, I., Cizmecioglu, O., Hoffmann, I., Grummt, I. and Voit, R. (2011). Human Cdc14B promotes progression through mitosis by dephosphorylating Cdc25 and regulating Cdk1/cyclin B activity. *PLoS ONE* **6**, e14711.
- Verlhac, M.-H., Lefebvre, C., Kubiak, J. Z., Umbhauer, M., Rassinier, P., Colledge, W. and Maro, B. (2000). Mos activates MAP kinase in mouse oocytes through two opposite pathways. *EMBO J.* **19**, 6065-6074.
- Vigneron, S., Brioudes, E., Burgess, A., Labbé, J. C., Lorca, T. and Castro, A. (2009). Greatwall maintains mitosis through regulation of PP2A. *EMBO J.* **28**, 2786-2793.
- Yu, J., Zhao, Y., Li, Z., Galas, S. and Goldberg, M. L. (2006). Greatwall kinase participates in the Cdc2 autoregulatory loop in *Xenopus* egg extracts. *Mol. Cell* **22**, 83-91.
